# Supplementary material for: Selective Condensation Drives Partitioning and Sequential Secretion of Cyst Wall Proteins in Differentiating Giardia lamblia
Source: PLOS journal article supplement (doi:10.1371/journal.ppat.1000835), 2010-04-08

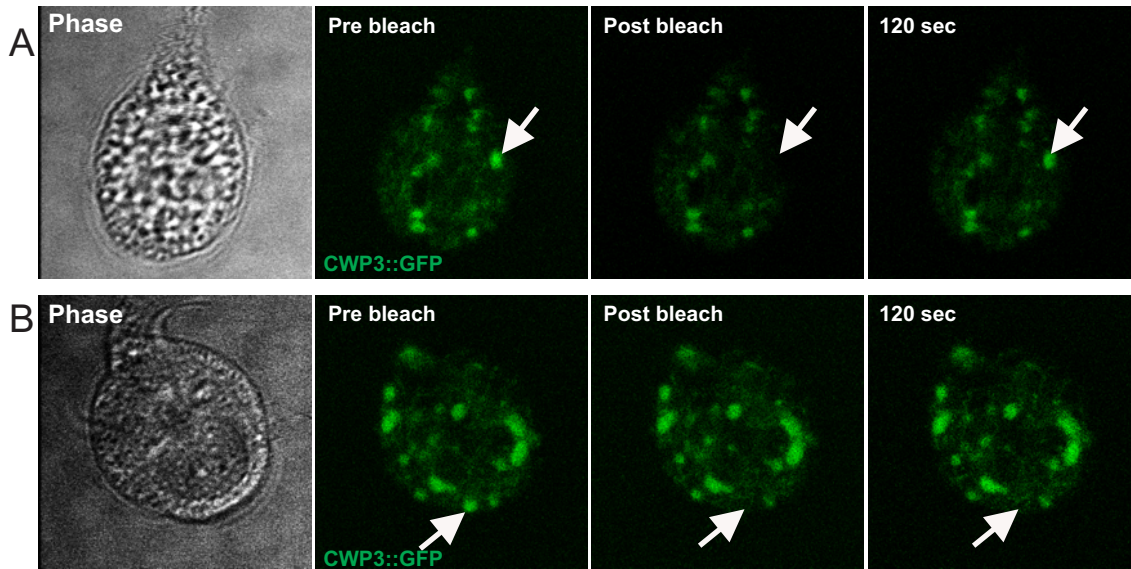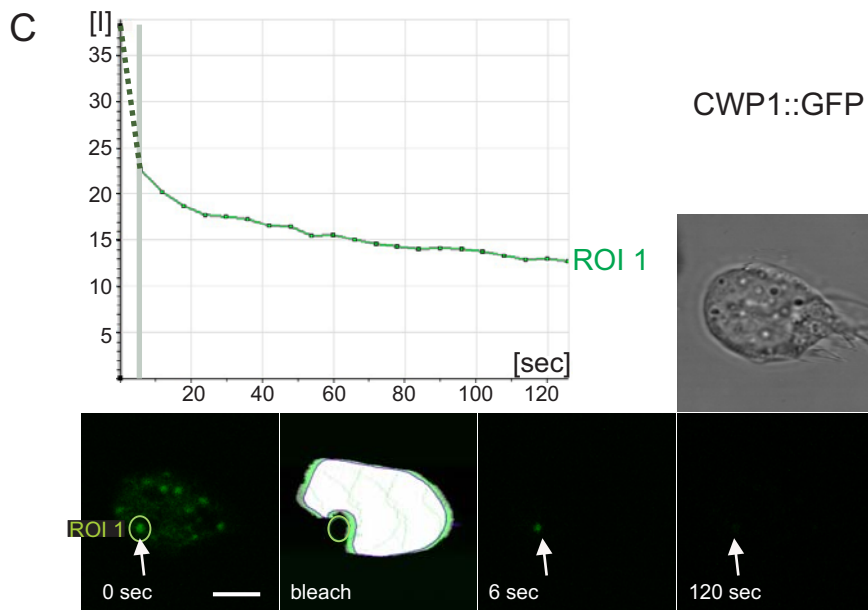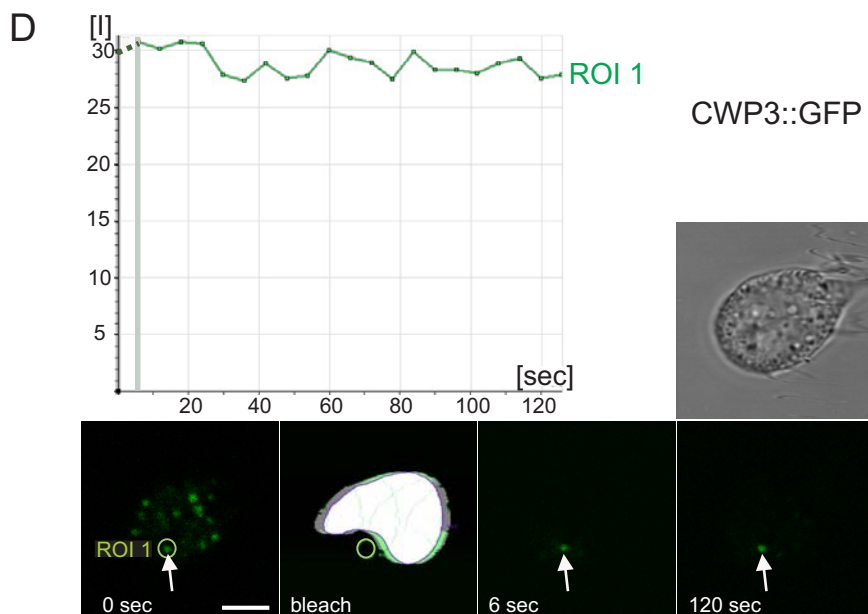

Supplement: S4 (10.1371/journal.ppat.1000835.s004) [file journal.ppat.1000835.s004]
